# Supplementary material for: Fine mapping of a QTL and identification of candidate genes associated with cold tolerance during germination in peanut (Arachis hypogaea L.) on chromosome B09 using whole genome re-sequencing
Source: Front Plant Sci. 2023 May 8;14:1153293. doi: 10.3389/fpls.2023.1153293 (PMC10200878; doi:10.3389/fpls.2023.1153293)
Supplement: Supplementary file 4 [file Table_3.xlsx]

## Sheet: Sheet2
Table S3 Sequencing information of the RIL population.
Sample_ID	Raw_Reads	Raw_Bases	clean_Reads	clean_Bases	Valid value (%)	Q 20 value (%)	Q 30 value (%)	GC content (%)
RDH01	100783158	15.12G	99766818	14.76G	97.62	97.12	92.17	40.69
RDH02	89192200	13.38G	88493978	13.06G	97.65	97.49	92.91	41.33
RDH03	83079106	12.46G	82613194	12.25G	98.34	97.34	92.52	43.33
RDH04	86623520	12.99G	86051530	12.78G	98.32	97.44	92.81	42
RDH05	81711500	12.26G	81317190	12.06G	98.37	97.8	93.55	43.88
RDH06	93166830	13.98G	92603132	13.73G	98.22	97.65	93.27	43.86
RDH07	77535538	11.63G	77121304	11.43G	98.3	97.79	93.52	41.42
RDH08	88676150	13.30G	88154550	13.06G	98.15	97.6	93.17	43.54
RDH09	98790264	14.82G	98291842	14.57G	98.33	97.84	93.66	43.61
RDH10	115827756	17.37G	115149248	17.05G	98.14	97.55	93.01	43.24
RDH100	102800236	15.42G	102175546	15.20G	98.58	97.68	93.33	41.96
RDH101	136972504	20.55G	136180900	20.21G	98.38	97.67	93.31	41.94
RDH102	107697362	16.15G	106966260	15.88G	98.3	97.42	92.75	41.78
RDH103	119726000	17.96G	118553394	17.70G	98.56	96.99	91.88	40.98
RDH104	86887080	13.03G	86197864	12.85G	98.56	97.21	92.32	41.17
RDH105	72881882	10.93G	72306888	10.80G	98.79	97.18	92.25	41.2
RDH106	69944166	10.49G	69416126	10.37G	98.83	97.11	92.11	42.3
RDH107	93820530	14.07G	93340480	13.90G	98.74	97.79	93.57	43.28
RDH108	120997406	18.15G	120249546	17.82G	98.18	97.65	93.28	41.52
RDH109	97028336	14.55G	96516806	14.33G	98.49	97.71	93.37	41.33
RDH11	96181890	14.43G	95332596	14.17G	98.25	96.96	91.78	41.79
RDH110	123460474	18.52G	122601100	18.26G	98.59	97.55	93.05	41.67
RDH111	132453778	19.87G	131682512	19.52G	98.25	97.76	93.5	41.69
RDH112	75574708	11.34G	74988566	11.12G	98.05	97.34	92.63	40.97
RDH113	70668224	10.60G	70143030	10.43G	98.38	97.4	92.72	40.84
RDH114	98331412	14.75G	97918626	14.43G	97.83	98.08	94.29	43.78
RDH115	79562624	11.93G	79033944	11.67G	97.79	98.18	94.68	41.78
RDH116	120166466	18.02G	118676918	17.65G	97.95	97.04	92.07	40.47
RDH117	200480028	30.07G	197563466	29.50G	98.09	96.62	91.25	41.34
RDH118	123729416	18.56G	122452408	18.24G	98.27	97.22	92.45	42.21
RDH119	202343094	30.35G	201369694	29.70G	97.85	97.77	93.51	41.76
RDH12	115806810	17.37G	114209740	16.85G	96.98	97.08	92.23	45.14
RDH120	125868484	18.88G	124976642	18.66G	98.85	97.45	92.78	40.3
RDH121	105714568	15.86G	105164924	15.56G	98.13	97.77	93.52	41.51
RDH122	77910922	11.69G	77375820	11.55G	98.83	97.43	92.76	41.03
RDH123	129011866	19.35G	127219340	18.95G	97.94	97.3	92.68	41.5
RDH124	74436230	11.17G	74078568	10.98G	98.33	97.8	93.57	41.97
RDH125	91783692	13.77G	90521794	13.48G	97.92	97.17	92.59	40.83
RDH126	75849122	11.38G	75267298	11.23G	98.66	97.16	92.2	41.31
RDH127	138684662	20.80G	137934718	20.48G	98.44	97.59	93.12	41.94
RDH128	130937826	19.64G	130111560	19.36G	98.55	97.47	92.85	41.42
RDH129	128554218	19.28G	127832162	19.02G	98.62	97.6	93.13	41.75
RDH13	84296502	12.64G	83415806	12.36G	97.79	96.84	91.58	41.15
RDH130	92842890	13.93G	92447850	13.51G	97	97.96	93.91	41.53
RDH131	111885236	16.78G	111042842	16.57G	98.76	97.25	92.4	41.07
RDH132	111363346	16.70G	110449936	16.47G	98.62	97.09	92.05	40.6
RDH133	108865068	16.33G	108051832	16.10G	98.57	97.35	92.63	40.8
RDH134	111403356	16.71G	110564098	16.50G	98.72	97.17	92.21	41.5
RDH135	163218982	24.48G	162137392	24.11G	98.48	97.44	92.77	41.3
RDH136	134279636	20.14G	133387242	19.91G	98.83	97.29	92.46	41.38
RDH137	89989630	13.50G	89007754	13.29G	98.46	96.79	91.51	40.16
RDH138	108036020	16.21G	107481750	16.03G	98.95	97.66	93.22	41.56
RDH139	87400900	13.11G	86665750	12.85G	98.02	97.35	92.7	41.15
RDH14	109000412	16.35G	107858358	15.95G	97.55	96.9	91.72	40.54
RDH140	95078626	14.26G	94180932	14.06G	98.58	96.94	91.77	40.61
RDH141	86362694	12.95G	85778500	12.77G	98.56	97.47	92.9	41.55
RDH142	119428054	17.91G	118518840	17.63G	98.41	97.21	92.3	40
RDH143	82474048	12.37G	82030616	12.17G	98.41	97.75	93.48	41.77
RDH144	96518306	14.48G	95938548	14.23G	98.27	97.68	93.37	41.77
RDH145	79171324	11.88G	78260590	11.64G	98.02	97.06	92.11	40.76
RDH146	89028618	13.35G	88569204	13.17G	98.59	97.75	93.48	41.64
RDH147	77310856	11.60G	76735150	11.43G	98.59	97.17	92.24	40.81
RDH148	86967496	13.05G	86212770	12.85G	98.47	96.91	91.69	40.19
RDH149	84560146	12.68G	84096388	12.53G	98.8	97.61	93.11	40.85
RDH15	85886992	12.88G	85316184	12.64G	98.1	97.29	92.5	42.78
RDH150	73147100	10.97G	72689614	10.82G	98.59	97.52	92.95	41.25
RDH151	92225878	13.83G	91289166	13.61G	98.42	96.85	91.64	41.07
RDH152	123204934	18.48G	122228910	18.14G	98.17	97.4	92.77	41.48
RDH153	77041668	11.56G	76422774	11.39G	98.59	97.33	92.59	41.35
RDH154	76377228	11.46G	75308724	11.16G	97.44	96.83	91.67	39.69
RDH155	74052724	11.11G	73412096	10.94G	98.48	97.4	92.78	41.22
RDH156	74134762	11.12G	73711698	10.87G	97.79	97.82	93.66	41.49
RDH157	83746606	12.56G	83030544	12.39G	98.6	97.15	92.2	40.8
RDH158	74897366	11.23G	74457170	10.98G	97.74	97.67	93.34	41.84
RDH159	109926880	16.49G	108910606	16.23G	98.41	97.64	93.33	41.12
RDH16	92746496	13.91G	92299590	12.94G	93.04	97.58	93.5	47.06
RDH160	85613992	12.84G	84845618	12.60G	98.13	97.52	93.15	44.41
RDH161	89707986	13.46G	89172914	13.28G	98.67	97.56	93.04	41.88
RDH162	97609398	14.64G	96703040	14.40G	98.38	97.17	92.28	40.6
RDH163	82569134	12.39G	82045140	12.19G	98.44	97.6	93.17	41.65
RDH164	96342832	14.45G	95629938	14.09G	97.48	97.88	94.08	42.23
RDH165	93085374	13.96G	92508586	13.56G	97.14	98.02	94.38	41.94
RDH166	95173764	14.28G	94505334	13.91G	97.45	97.89	94.13	41.99
RDH167	81453900	12.22G	80832956	12.01G	98.26	97.84	93.87	41.71
RDH168	71396842	10.71G	70927302	10.48G	97.88	98.08	94.38	41.65
RDH169	92386314	13.86G	91810958	13.31G	96.04	97.99	94.33	42.09
RDH17	107675084	16.15G	105960892	15.71G	97.29	96.95	91.94	41.77
RDH170	125406250	18.81G	115481622	17.21G	91.48	92.35	84.62	43.2
RDH171	91397854	13.71G	89561976	13.35G	97.39	96.56	91.46	43.5
RDH172	87403006	13.11G	85594198	12.71G	96.92	96.34	91.01	43.52
RDH173	84474150	12.67G	83877092	12.38G	97.73	97.91	94.07	42.68
RDH174	76401630	11.46G	75807496	11.27G	98.31	97.86	93.9	41.74
RDH175	92057152	13.81G	91378400	13.61G	98.53	97.84	93.85	41.45
RDH176	90334224	13.55G	89801060	13.23G	97.6	98.04	94.34	41.77
RDH177	83082704	12.46G	82569474	12.17G	97.68	98.05	94.31	41.79
RDH178	69698684	10.45G	69136418	10.29G	98.38	97.8	93.77	40.99
RDH179	72264490	10.84G	71817020	10.57G	97.52	98.08	94.51	42.31
RDH18	97271444	14.59G	96624688	14.34G	98.3	97.56	93.05	42.1
RDH180	124139408	18.62G	122804688	18.10G	97.18	97.19	92.81	43.76
RDH181	128932414	19.34G	125892152	18.77G	97.04	96.17	90.71	43.1
RDH182	87061382	13.06G	86254328	12.85G	98.39	97.64	93.42	41.52
RDH183	69781740	10.47G	68965890	10.25G	97.92	97.45	93.04	40.7
RDH184	109827364	16.47G	108638152	16.09G	97.68	97.94	94.16	40.53
RDH185	98566408	14.78G	97907118	14.47G	97.88	98.26	94.78	41.7
RDH186	89328704	13.40G	85772352	12.80G	95.49	94.41	87.52	43.57
RDH187	91745936	13.76G	90889488	13.49G	98.02	97.83	93.88	41.28
RDH188	96698618	14.50G	95398472	14.16G	97.65	97.17	92.62	41.56
RDH189	90144612	13.52G	89150074	13.18G	97.44	97.52	93.34	41.78
RDH19	85488432	12.82G	84597044	12.59G	98.16	96.67	91.36	44.34
RDH190	86403628	12.96G	85766278	12.62G	97.34	97.86	94.01	42.01
RDH191	110384948	16.56G	108944556	16.12G	97.34	97.79	93.85	40.62
RDH192	68801706	10.32G	65638626	9.78G	94.8	94.29	87.61	43.23
RDH193	89442002	13.42G	88835982	13.17G	98.2	98.23	94.7	41.68
RDH194	119294928	17.89G	115691360	17.23G	96.31	96.19	90.76	43.74
RDH195	100703212	15.11G	99273138	14.73G	97.52	97.65	93.54	40.08
RDH196	79251212	11.89G	78610556	11.62G	97.78	98.07	94.37	41.15
RDH197	88521686	13.28G	87219480	12.95G	97.51	97.15	92.61	41.13
RDH198	89995420	13.50G	89134548	13.18G	97.62	97.66	93.6	41.94
RDH199	91686078	13.75G	90820388	13.38G	97.32	97.76	93.77	40.29
RDH20	121958528	18.29G	120195624	17.52G	95.79	97.28	92.66	43.04
RDH200	73392796	11.01G	71393516	10.63G	96.58	95.26	88.96	41.66
RDH21	98494586	14.77G	97729230	14.47G	97.96	97.44	92.86	42.37
RDH22	92195310	13.83G	91557500	13.56G	98.04	97.48	92.89	41.52
RDH23	96493864	14.47G	95985014	14.13G	97.63	97.75	93.45	42.28
RDH24	136431200	20.46G	134912992	20.12G	98.32	97.02	91.97	41.03
RDH25	112507798	16.88G	111653776	16.67G	98.78	97.25	92.34	41.11
RDH26	78522408	11.78G	77909280	11.60G	98.48	97.35	92.58	41.42
RDH27	95329126	14.30G	93873170	13.31G	93.12	97.15	92.69	48.72
RDH28	85030200	12.75G	84461514	12.57G	98.55	97.48	92.85	41.38
RDH29	106164090	15.92G	105315046	15.61G	98.04	97.44	92.96	44.99
RDH30	103278452	15.49G	102309936	15.20G	98.14	97.06	92	41
RDH31	113553244	17.03G	112785234	16.81G	98.7	97.36	92.58	41.61
RDH32	102129218	15.32G	101468738	15.09G	98.47	97.41	92.68	41.72
RDH33	133124950	19.97G	132183186	19.71G	98.73	97.19	92.22	41.39
RDH34	108999610	16.35G	108441796	15.99G	97.8	97.66	93.26	42.79
RDH35	134700526	20.21G	133453530	19.86G	98.3	97.05	92.01	42.51
RDH36	117265480	17.59G	116558572	17.35G	98.62	97.56	93.06	42.97
RDH37	89941104	13.49G	89223870	13.26G	98.25	96.99	91.89	41.51
RDH38	100456870	15.07G	99847406	14.88G	98.74	97.21	92.3	41.69
RDH39	76806080	11.52G	76380144	11.36G	98.57	97.36	92.64	41.83
RDH40	90416380	13.56G	89716604	13.30G	98.09	97.92	94.13	41.73
RDH41	96741718	14.51G	96079120	14.32G	98.65	97.1	92.1	41.65
RDH42	117596546	17.64G	116247300	17.08G	96.81	97.2	92.83	44.45
RDH43	117848522	17.68G	116833504	17.26G	97.67	97.09	92.19	44.46
RDH44	102152058	15.32G	101443350	15.09G	98.47	97.04	92.01	42.89
RDH45	102602948	15.39G	101879754	15.11G	98.18	97.23	92.38	42.03
RDH46	751461838	112.72G	747433626	111.01G	98.48	97.45	92.82	41.91
RDH47	81092316	12.16G	80562948	11.96G	98.29	97.21	92.35	41.64
RDH48	82809254	12.42G	82296126	12.21G	98.33	97.33	92.58	41.78
RDH49	85015558	12.75G	84348578	12.56G	98.5	97.01	91.93	41.28
RDH50	89207464	13.38G	88736938	13.17G	98.44	97.37	92.62	41.57
RDH51	116366398	17.45G	115477274	17.24G	98.76	97.07	92.04	41.48
RDH52	70637746	10.60G	70023578	10.37G	97.89	96.77	91.44	39.73
RDH53	76597988	11.49G	76125044	11.29G	98.29	97.38	92.68	41.61
RDH54	73477718	11.02G	73049844	10.88G	98.74	97.31	92.53	41.15
RDH55	75110618	11.27G	74681354	11.07G	98.28	97.25	92.4	41.53
RDH56	109954380	16.49G	109229814	16.16G	97.98	97.36	92.69	41.91
RDH57	97067960	14.56G	96602616	14.31G	98.25	97.88	93.75	41.65
RDH58	79820754	11.97G	79209472	11.78G	98.41	96.99	91.85	41.16
RDH59	77639646	11.65G	77036062	11.45G	98.31	96.98	91.89	41.54
RDH60	90268196	13.54G	89656252	13.22G	97.64	97.27	92.51	41.9
RDH61	87676882	13.15G	86927112	12.96G	98.52	96.84	91.57	41.45
RDH62	85678328	12.85G	84887796	12.62G	98.16	96.8	91.52	40.59
RDH63	80336882	12.05G	79760622	11.86G	98.4	97.22	92.37	41.63
RDH64	132414830	19.86G	131226268	19.56G	98.46	97.08	92.1	41.58
RDH65	87975422	13.20G	87429728	12.98G	98.35	97.34	92.61	42.16
RDH66	84391078	12.66G	83394268	12.24G	96.67	96.59	91.33	42.35
RDH67	110532030	16.58G	109359364	16.30G	98.34	96.91	91.81	42.1
RDH68	86061302	12.91G	85464338	12.71G	98.46	97.17	92.22	41.83
RDH69	83473688	12.52G	82825670	12.33G	98.48	97.18	92.31	41.8
RDH70	81845384	12.28G	81245508	12.09G	98.45	97.02	91.9	40.14
RDH71	109900060	16.49G	109156212	16.08G	97.56	97.64	93.34	42.05
RDH72	79647122	11.95G	79170772	11.73G	98.18	97.48	92.89	41.7
RDH73	70417996	10.56G	69957558	10.37G	98.13	97.29	92.53	41.65
RDH74	93430904	14.01G	92693910	13.74G	98.07	97.24	92.46	41.51
RDH75	114459544	17.17G	113783806	16.82G	97.99	97.43	92.77	41.82
RDH76	85566736	12.84G	84992390	12.64G	98.44	97.26	92.44	41.82
RDH77	85991170	12.90G	85223180	12.62G	97.86	96.91	91.7	39.99
RDH78	72421336	10.86G	71855596	10.71G	98.54	97.08	92.08	42.12
RDH79	76907024	11.54G	76434064	11.23G	97.32	97.41	92.81	42.56
RDH80	73636272	11.05G	72879340	10.85G	98.19	97.04	92.04	41.62
RDH81	93539372	14.03G	92777262	13.79G	98.29	97.25	92.47	41.87
RDH82	93025946	13.95G	92461948	13.70G	98.21	97.57	93.05	41.83
RDH83	111926128	16.79G	111247462	16.49G	98.24	97.5	92.9	41.39
RDH84	106030882	15.90G	105309394	15.63G	98.25	97.37	92.61	41.59
RDH85	102544954	15.38G	101712300	15.13G	98.39	97.24	92.35	40.54
RDH86	87833264	13.17G	87356562	12.90G	97.88	97.65	93.26	41.49
RDH87	75993982	11.40G	75489860	11.16G	97.94	97.49	92.89	41.62
RDH88	72194956	10.83G	71820928	10.51G	97.09	97.69	93.39	42.08
RDH89	80455474	12.07G	79879420	11.80G	97.81	97.34	92.58	40.18
RDH90	106163544	15.92G	105284768	15.68G	98.46	97.15	92.15	40.87
RDH91	104177430	15.63G	102738970	15.35G	98.2	96.21	90.29	41.88
RDH92	100744810	15.11G	99781470	14.89G	98.5	96.93	91.72	41.48
RDH93	76542308	11.48G	75947932	11.33G	98.7	96.64	91.03	42.05
RDH94	83863124	12.58G	83185920	12.38G	98.43	96.92	91.69	42.15
RDH95	89904112	13.49G	89489158	13.20G	97.9	98.02	94.11	42.87
RDH96	77418706	11.61G	76147848	11.14G	95.94	96.12	90.45	41.83
RDH97	80581394	12.09G	80168424	11.85G	98.05	97.86	93.74	41.77
RDH98	78299928	11.74G	77692922	11.60G	98.74	97.29	92.51	41.32
RDH99	91575002	13.74G	89961260	13.42G	97.67	96.87	92.06	41.37
DF12	413396566	62.01G	410842532	56.57G	91.23	97.47	93.21	42.09
Huayu 44	324476046	48.67G	319651246	47.50G	97.59	97.16	92.46	40.63
